# Supplementary material for: Genetic Variation Is the Major Determinant of Individual Differences in Leukocyte Endothelial Adhesion
Source: PLOS journal article supplement (doi:10.1371/journal.pone.0087883), 2014-02-10
Supplement: S2 (10.1371/journal.pone.0087883.s002) [file journal.pone.0087883.s002.pdf › journal.pone.0087883.s002.pdf]

|                      | Twins              | Siblings           |
|----------------------|--------------------|--------------------|
| Number of cell lines | 46                 | 46                 |
| Gender               | 12 Male; 34 female | 12 Male; 34 Female |
| Age                  | 33.43±13.20        | 24.41 ± 4.67       |
